# Supplementary material for: Reducing shoulder complaints in employees with high occupational shoulder exposures: study protocol for a cluster-randomised controlled study (The Shoulder-Café Study)
Source: Springer Nature journal article supplement (doi:10.1186/s13063-019-3703-y), 2019-11-12
Supplement: MOESM3 [file 17379068]

### **The law says**

All work tasks must be planned, organised, and performed in a safe manner.

### **Contact**

Jeanette Trøstrup  
Elective Surgery Centre  
Silkeborg Regional Hospital  
Denmark

### **How to reduce occupational shoulder exposures**

In this pamphlet you can read about the different types of occupational shoulder exposures and how to reduce them.

#### **Work with high shoulder exposures include**

- Work with elevated arms
- Work with repetitive shoulder movements
- Work with forceful shoulder exertions

### **Work with elevated arms**

Work where one or both elbows are lifted to around or above shoulder height (90°).

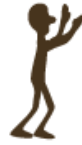

Work with elevated arms often occurs in e.g.

- House painters
- Electricians
- Insulation workers
- Scaffolders
- Carpenters

#### How is the exposure reduced?

- Reduce the amount of time spent with overhead tasks.
- Use technical aids wherever possible.
- Design the workplace appropriately and ensure adequate work space.

### **Work with repetitive shoulder movements**

Work with fast repetitive shoulder movements, which is performed for a large part of the working day.

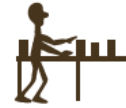

Work with repetitive shoulder movements often occurs in e.g.

- Manual packers
- Laundry workers
- Cleaners
- Kitchen assistants
- Bakers

#### How is the exposure reduced?

- Use technical solutions, e.g. machines or robots to perform repetitive tasks.
- Reduce time with repetitive work, e.g. by rotation, so that the repetitive work is distributed among several workers.

### **Work with forceful shoulder exertions**

Work which is physically demanding for the shoulders, e.g. lifting, pulling, and pushing.

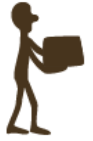

Work with forceful shoulder exertions often occurs in e.g.

- Scaffolders
- Slaughterhouse workers
- Wood industry workers
- Bricklayers' assistants
- Poultry processing workers
- Carpenters

#### How is the exposure reduced?

- Plan and organise the work, e.g. order and use items that weigh less.
- Use technical solutions, e.g. lift, crane, hoist, and similar equipment for handling heavy items.
- Heavy items should be lifted by two or more workers.
