# Supplementary material for: Reducing shoulder complaints in employees with high occupational shoulder exposures: study protocol for a cluster-randomised controlled study (The Shoulder-Café Study)
Source: Springer Nature journal article supplement (doi:10.1186/s13063-019-3703-y), 2019-11-12

Additional file 4: Individual feedback on occupational shoulder exposures

**First feedback-letter:**

Dear xxxx,

After our first meeting you have been working 1–5 days with the Axivity attached to your shoulder and you have filled out a work diary.

Based on your measurements and diary, you are medium exposed to work with elevated arms (> 60° and > 90°) and repetitive shoulder movements and low exposed to forceful shoulder exertions. If you have any questions, feel free to contact us.

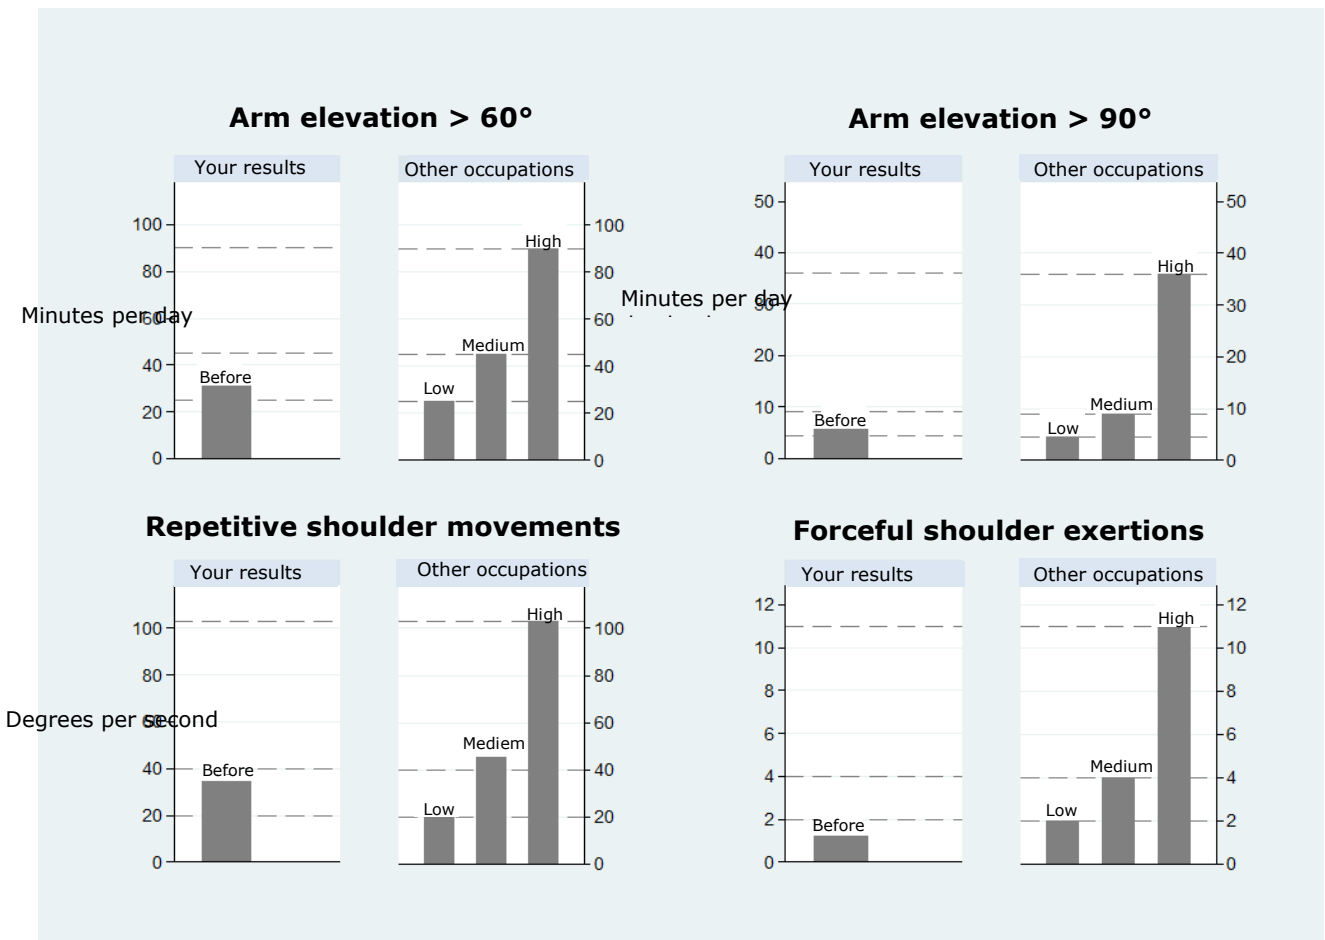

**Second feedback-letter:**

Dear xxxx,

Thank you for participating in the scientific project "Reducing shoulder complaints and shoulder exposures".

We have analysed your second Axivity measurements and work diary. The figures below illustrate the results of your measurements. You can compare your second measurements with your first measurements (before and after).

You are welcome to contact Jeanette Trøstrup if you have any questions (phone number 2475 9153; or email: [jeatro@rm.dk](mailto:jeatro@rm.dk)).

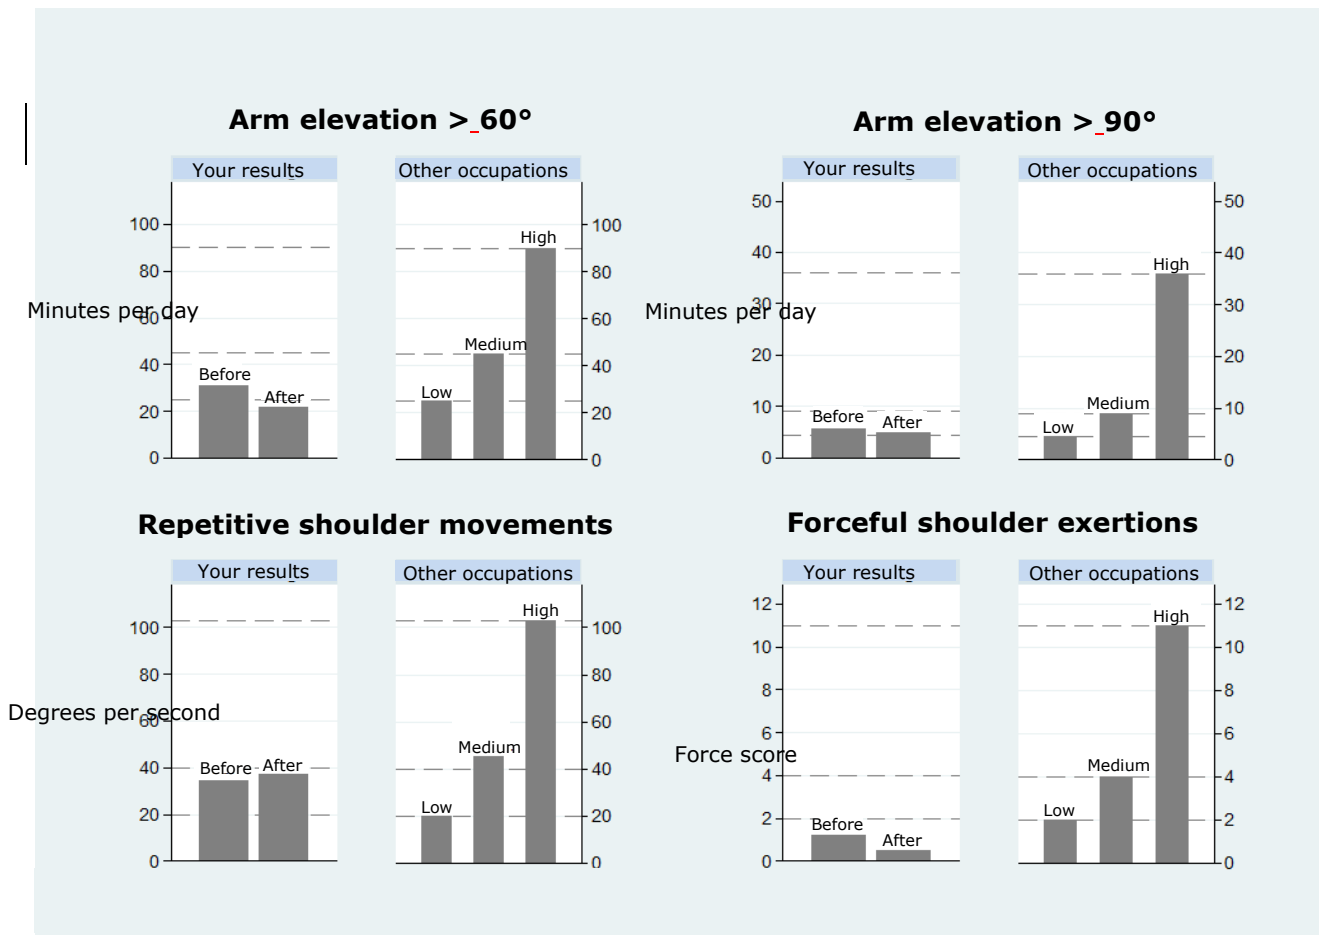

Supplement: MOESM4 [file 17379068]
