# Supplementary material for: Reducing shoulder complaints in employees with high occupational shoulder exposures: study protocol for a cluster-randomised controlled study (The Shoulder-Café Study)
Source: Springer Nature journal article supplement (doi:10.1186/s13063-019-3703-y), 2019-11-12
Supplement: MOESM6 [file 17379068]

## Additional file 6: Clinical shoulder evaluation form

Participant (name) \_\_\_\_\_

Participant ID \_\_\_\_\_

Date: \_\_\_\_ / \_\_\_\_ - \_\_\_\_

Physiotherapist initials: \_\_\_\_\_

**History**

For how long have you experienced pain? (week, month, year) \_\_\_\_\_

Is the pain caused by trauma:  No YesOther symptoms:  No Yes, which: weight loss / difficulty breathing / coughing / expectoration of sputum / fever / dizziness / headache / fatigue

Additional history (if necessary)

Current symptoms: neck / shoulder blade / shoulder / upper arm / elbow / forearm / hand

R/L

Pain: constant / intermittent / nightly \_\_\_\_\_

What aggravates / improves: \_\_\_\_\_

Pain medication: \_\_\_\_\_

Other treatment: \_\_\_\_\_

Work / sport / leisure: \_\_\_\_\_

Other diseases: \_\_\_\_\_

Other: \_\_\_\_\_

**Clinical findings**

| <b>Inspection</b>        | <b>Right</b>                                                                                                                                                                                                                                                                                                               | <b>Left</b>                                                                                                                                                                                                                                                                                                                |
|--------------------------|----------------------------------------------------------------------------------------------------------------------------------------------------------------------------------------------------------------------------------------------------------------------------------------------------------------------------|----------------------------------------------------------------------------------------------------------------------------------------------------------------------------------------------------------------------------------------------------------------------------------------------------------------------------|
| Atrophy                  | <input type="checkbox"/> No<br><input type="checkbox"/> Yes, located<br><input type="checkbox"/> Infraspinatus<br><input type="checkbox"/> Supraspinatus<br><input type="checkbox"/> Deltoid<br><input type="checkbox"/> Other: _____                                                                                      | <input type="checkbox"/> No<br><input type="checkbox"/> Yes, located:<br><input type="checkbox"/> Infraspinatus<br><input type="checkbox"/> Supraspinatus<br><input type="checkbox"/> Deltoid<br><input type="checkbox"/> Other: _____                                                                                     |
| Shoulder malalignment    | <input type="checkbox"/> No<br><input type="checkbox"/> Yes, malalignment: _____                                                                                                                                                                                                                                           | <input type="checkbox"/> No<br><input type="checkbox"/> Yes, malalignment: _____                                                                                                                                                                                                                                           |
| <b>Col. cerv.</b>        | <b>Right</b>                                                                                                                                                                                                                                                                                                               | <b>Left</b>                                                                                                                                                                                                                                                                                                                |
| Range of motion          | <input type="checkbox"/> Normal<br><input type="checkbox"/> Decreased<br><input type="checkbox"/> Pain<br>Describe: _____                                                                                                                                                                                                  | <input type="checkbox"/> Normal<br><input type="checkbox"/> Decreased<br><input type="checkbox"/> pain<br>Describe: _____                                                                                                                                                                                                  |
| Foramen compression test | <input type="checkbox"/> Negative<br><input type="checkbox"/> Positive                                                                                                                                                                                                                                                     | <input type="checkbox"/> Negative<br><input type="checkbox"/> Positive                                                                                                                                                                                                                                                     |
| <b>Shoulder</b>          | <b>Right</b>                                                                                                                                                                                                                                                                                                               | <b>Left</b>                                                                                                                                                                                                                                                                                                                |
| Scapulohumeral rhythm    | <input type="checkbox"/> No scapular dyskinesia<br><input type="checkbox"/> Scapular dyskinesia, describe: _____                                                                                                                                                                                                           | <input type="checkbox"/> No scapular dyskinesia<br><input type="checkbox"/> Scapular dyskinesia, describe: _____                                                                                                                                                                                                           |
| Painful arc test         | <input type="checkbox"/> Negative<br><input type="checkbox"/> Positive: <input type="checkbox"/> 60 - 120° and/or <input type="checkbox"/> > 120°                                                                                                                                                                          | <input type="checkbox"/> Negative<br><input type="checkbox"/> Positive: <input type="checkbox"/> 60 - 120° and/or <input type="checkbox"/> > 120°                                                                                                                                                                          |
| AROM/PROM                | <input type="checkbox"/> AROM<br><input type="checkbox"/> PROM                                                                                                                                                                                                                                                             | <input type="checkbox"/> AROM<br><input type="checkbox"/> PROM                                                                                                                                                                                                                                                             |
| Flex:                    | _____°                                                                                                                                                                                                                                                                                                                     | _____°                                                                                                                                                                                                                                                                                                                     |
| Abd:                     | _____°                                                                                                                                                                                                                                                                                                                     | _____°                                                                                                                                                                                                                                                                                                                     |
| Ext rot:                 | _____°                                                                                                                                                                                                                                                                                                                     | _____°                                                                                                                                                                                                                                                                                                                     |
| Int rot:                 | <input type="checkbox"/> Shoulder blade<br>_____°<br><input type="checkbox"/> TH 12<br>_____°<br><input type="checkbox"/> Waist<br>_____°<br><input type="checkbox"/> SI-joint<br>_____°<br><input type="checkbox"/> Buttock<br>_____°<br><input type="checkbox"/> Thigh<br>_____°                                         | <input type="checkbox"/> Shoulder blade<br>_____°<br><input type="checkbox"/> TH 12<br>_____°<br><input type="checkbox"/> Waist<br>_____°<br><input type="checkbox"/> SI-joint<br>_____°<br><input type="checkbox"/> Buttock<br>_____°<br><input type="checkbox"/> Thigh<br>_____°                                         |
| <b>Palpation</b>         | <b>Right</b>                                                                                                                                                                                                                                                                                                               | <b>Left</b>                                                                                                                                                                                                                                                                                                                |
| Tenderness               | <input type="checkbox"/> No<br><input type="checkbox"/> Yes, located:<br><input type="checkbox"/> Sulcus<br><input type="checkbox"/> Sternoclav-joint<br><input type="checkbox"/> AC-joint<br><input type="checkbox"/> GH-joint<br><input type="checkbox"/> Muscular: Trapez / Lev. sca / IS / SS / Pec.major / Regio nuc. | <input type="checkbox"/> No<br><input type="checkbox"/> Yes, located:<br><input type="checkbox"/> Sulcus<br><input type="checkbox"/> Sternoclav-joint<br><input type="checkbox"/> AC-joint<br><input type="checkbox"/> GH-joint<br><input type="checkbox"/> Muscular: Trapez / Lev. sca / IS / SS / Pec.major / Regio nuc. |

| <b>Reduced strength</b>                          | <b>Right</b>                      |                                   | <b>Left</b>                       |                                   |
|--------------------------------------------------|-----------------------------------|-----------------------------------|-----------------------------------|-----------------------------------|
| Elev / flex                                      | <input type="checkbox"/> No       | <input type="checkbox"/> Yes      | <input type="checkbox"/> No       | <input type="checkbox"/> Yes      |
| Abd / add                                        | <input type="checkbox"/> No       | <input type="checkbox"/> Yes      | <input type="checkbox"/> No       | <input type="checkbox"/> Yes      |
| Ext rot                                          | <input type="checkbox"/> No       | <input type="checkbox"/> Yes      | <input type="checkbox"/> No       | <input type="checkbox"/> Yes      |
| Int rot                                          | <input type="checkbox"/> No       | <input type="checkbox"/> Yes      | <input type="checkbox"/> No       | <input type="checkbox"/> Yes      |
| <b>Pain when moving against resistance</b>       | <b>Right</b>                      |                                   | <b>Left</b>                       |                                   |
| Flex / ext                                       | <input type="checkbox"/> No       | <input type="checkbox"/> Yes      | <input type="checkbox"/> No       | <input type="checkbox"/> Yes      |
| Abd / add                                        | <input type="checkbox"/> No       | <input type="checkbox"/> Yes      | <input type="checkbox"/> No       | <input type="checkbox"/> Yes      |
| Ext rot                                          | <input type="checkbox"/> No       | <input type="checkbox"/> Yes      | <input type="checkbox"/> No       | <input type="checkbox"/> Yes      |
| Int rot                                          | <input type="checkbox"/> No       | <input type="checkbox"/> Yes      | <input type="checkbox"/> No       | <input type="checkbox"/> Yes      |
| <b>Specific tests</b>                            | <b>Right</b>                      |                                   | <b>Left</b>                       |                                   |
| Jobe's                                           | <input type="checkbox"/> Negative | <input type="checkbox"/> Positive | <input type="checkbox"/> Negative | <input type="checkbox"/> Positive |
| Hawkins'                                         | <input type="checkbox"/> Negative | <input type="checkbox"/> Positive | <input type="checkbox"/> Negative | <input type="checkbox"/> Positive |
| Hawkins' modified                                | <input type="checkbox"/> Negative | <input type="checkbox"/> Positive | <input type="checkbox"/> Negative | <input type="checkbox"/> Positive |
| Neer's                                           | <input type="checkbox"/> Negative | <input type="checkbox"/> Positive | <input type="checkbox"/> Negative | <input type="checkbox"/> Positive |
| O'Brien                                          | <input type="checkbox"/> Negative | <input type="checkbox"/> Positive | <input type="checkbox"/> Negative | <input type="checkbox"/> Positive |
| Cross over                                       | <input type="checkbox"/> Negative | <input type="checkbox"/> Positive | <input type="checkbox"/> Negative | <input type="checkbox"/> Positive |
| Scapula Assistance test                          | <input type="checkbox"/> Negative | <input type="checkbox"/> Positive | <input type="checkbox"/> Negative | <input type="checkbox"/> Positive |
| Scapula Retraction Test                          | <input type="checkbox"/> Negative | <input type="checkbox"/> Positive | <input type="checkbox"/> Negative | <input type="checkbox"/> Positive |
| <b>Additional tests (performed if necessary)</b> |                                   |                                   |                                   |                                   |
| Yergason                                         | <input type="checkbox"/> Negative | <input type="checkbox"/> Positive | <input type="checkbox"/> Negative | <input type="checkbox"/> Positive |
| Apprehension                                     | <input type="checkbox"/> Negative | <input type="checkbox"/> Positive | <input type="checkbox"/> Negative | <input type="checkbox"/> Positive |
| Relocation                                       | <input type="checkbox"/> Negative | <input type="checkbox"/> Positive | <input type="checkbox"/> Negative | <input type="checkbox"/> Positive |
| Sulcus                                           | <input type="checkbox"/> Negative | <input type="checkbox"/> Positive | <input type="checkbox"/> Negative | <input type="checkbox"/> Positive |
| Belly pres                                       | <input type="checkbox"/> Negative | <input type="checkbox"/> Positive | <input type="checkbox"/> Negative | <input type="checkbox"/> Positive |
| Hornblower's                                     | <input type="checkbox"/> Negative | <input type="checkbox"/> Positive | <input type="checkbox"/> Negative | <input type="checkbox"/> Positive |
| <b>Comments to tests</b>                         |                                   |                                   |                                   |                                   |

### Categorisation

- Subacromial impingement syndrome
- Muscle tenderness
- Frozen shoulder
- Rotator-cuff-rupture
- Suspicion about nerve injury
- AC-joint problems
- Instability, conditional on:
  - Hypermobility
  - Trauma
- Other: \_\_\_\_\_

### Treatment plan

- Exercise
- No exercise
- Advised to contact general practitioner

### Comments

---



---



---

#### Abbreviations:

Abd = Abduction  
 AC = Acromioclavicular  
 Add = Adduction  
 AROM = Active range of motion  
 Elev = Elevation  
 Ext = External  
 Flex = Flexion

GH = Glenohumeral  
Int = Internal  
IS = Infraspinatus  
Lev.sca = Levator scapulae  
Pec.major = Pectoralis major  
Regio nuc = Regio nuchae  
PROM = Passive range of motion  
SI = Sacroiliac  
SS = Supraspinatus  
Sternoclav = sternoclavicular  
TH 12 = Twelfth thoracic vertebra

\* A clinical shoulder evaluation manual can be requested in Danish from Jeanette Trøstrup ([jeatro@rm.dk](mailto:jeatro@rm.dk)).
