# Supplementary material for: Reducing shoulder complaints in employees with high occupational shoulder exposures: study protocol for a cluster-randomised controlled study (The Shoulder-Café Study)
Source: Springer Nature journal article supplement (doi:10.1186/s13063-019-3703-y), 2019-11-12
Supplement: MOESM10 [file 17379068]

## Additional file 10: List of questionnaires and other documents used in the project

### Questionnaires:

- Screening questionnaire
- Questionnaire A: Baseline
- Questionnaire B: 6 month follow-up
- Questionnaire C: 12 month follow-up
- Questionnaire about workplace visit

### Diaries:

- Exercise diary
- Work diary

### Other documents:

- Telephone interview registration form
- Workplace visit registration form
- Clinical shoulder evaluation manual
- How to use Axivity
- Informed consent

Danish versions of these documents can be requested from Jeanette Trøstrup (email: [jeatro@rm.dk](mailto:jeatro@rm.dk)).
