# Supplementary material for: Reducing shoulder complaints in employees with high occupational shoulder exposures: study protocol for a cluster-randomised controlled study (The Shoulder-Café Study)
Source: Springer Nature journal article supplement (doi:10.1186/s13063-019-3703-y), 2019-11-12
Supplement: MOESM11 [file 17379068]

**Table 2:** Schedule for study procedures. For each batch of companies, the two interventions (Shoulder-Café and Shoulder-Guidance) start and end simultaneously.

| Time point                                     | Pre-intervention | Intervention                          |                              |                                   | Follow-up         |                               |                                |
|------------------------------------------------|------------------|---------------------------------------|------------------------------|-----------------------------------|-------------------|-------------------------------|--------------------------------|
|                                                |                  | 1 <sup>st</sup> day (T <sub>0</sub> ) | Shortly after T <sub>0</sub> | EOI 3 months after T <sub>0</sub> | Shortly after EOI | 6 months after T <sub>0</sub> | 12 months after T <sub>0</sub> |
| <b>ENROLMENT</b>                               |                  |                                       |                              |                                   |                   |                               |                                |
| Company randomisation *                        | x                |                                       |                              |                                   |                   |                               |                                |
| Informed consent                               | x                |                                       |                              |                                   |                   |                               |                                |
| Revealing randomisation result to participants |                  | x **                                  |                              |                                   |                   |                               |                                |
| <b>INTERVENTION</b>                            |                  |                                       |                              |                                   |                   |                               |                                |
| Shoulder-Café                                  |                  | ←————→                                |                              |                                   |                   |                               |                                |
| Shoulder-Guidance                              |                  | ←————→                                |                              |                                   |                   |                               |                                |
| <b>OUTCOME ASSESSMENTS</b>                     |                  |                                       |                              |                                   |                   |                               |                                |
| <b>Primary outcomes</b>                        |                  |                                       |                              |                                   |                   |                               |                                |
| <b>Hypothesis I</b>                            |                  |                                       |                              |                                   |                   |                               |                                |
| OSS at 6 month follow-up                       | x ***            |                                       |                              |                                   |                   | x                             |                                |
| <b>Hypothesis II</b>                           |                  |                                       |                              |                                   |                   |                               |                                |
| Arm elevation > 60°                            |                  |                                       | ↔                            |                                   | ↔                 |                               |                                |
| <b>Secondary Outcomes</b>                      |                  |                                       |                              |                                   |                   |                               |                                |
| <b>Hypothesis I</b>                            |                  |                                       |                              |                                   |                   |                               |                                |
| OSS at 12 month follow-up                      | x ***            |                                       |                              |                                   |                   |                               | x                              |
| FABQ-PA at 6 month follow-up                   | x ***            |                                       |                              |                                   |                   | x                             |                                |
| PGIC at 6 month follow-up                      |                  |                                       |                              |                                   |                   | x                             |                                |
| FABQ-PA at 12 month                            | x ***            |                                       |                              |                                   |                   |                               | x                              |

follow-up

**Hypothesis II**

Arm elevation > 90°

↔

↔

Repetitive shoulder movements

↔

↔

Forceful shoulder exertions

↔

↔

Arm elevation > 30°

↔

↔

**Supplementary outcomes**

Hypothesis I

NRS at rest

x

x

x

NRS during activity

x

x

x

Quick DASH + work module

x

x

EQ5D-3L

x

x

Work Ability Score

x

x

x

PGIC at 12 month follow-up

x

Satisfaction questionnaire

x

x

Felt informed about how to

x

handle shoulder complaints, how to perform shoulder exercises, and how to reduce occupational shoulder exposures (questionnaire)

**Hypothesis II**

Work modification

x

x

**OTHER ASSESSMENTS**

Smoking status

x

Body mass index

x

Duration of shoulder complaints

x

Psychosocial work exposures

x

|                                                            |   |        |   |   |
|------------------------------------------------------------|---|--------|---|---|
| Occupational mechanical shoulder exposures (self-reported) | x |        |   |   |
| Job title                                                  | x |        |   | x |
| Weekly working hours                                       | x |        |   | x |
| System of wage payment                                     | x |        |   | x |
| How often exercise was performed                           |   |        |   | x |
| Work status                                                |   |        |   | x |
| Typical working day                                        |   | ↔      | ↔ |   |
| <b>ADHERENCE</b>                                           |   |        |   |   |
| Café meetings ****                                         |   | ←————→ |   |   |
| Exercise diary                                             |   | ←————→ |   |   |
| Work diary                                                 |   | ↔      | ↔ |   |
| <b>CO INTERVENTIONS</b>                                    |   |        |   |   |
| Steroid injection                                          |   |        | x | x |
| Shoulder surgery                                           |   |        | x | x |
| Seen by doctor because of shoulder complaints              |   |        | x |   |
| Shoulder treatment by physiotherapist outside the project  |   |        | x |   |
| Shoulder treatment by chiropractor                         |   |        | x |   |
| Pain medication in last 4 weeks                            | x |        | x |   |
| <b>ADVERSE EVENTS</b>                                      |   |        | x |   |

\* Randomisation of a batch of companies takes place around 2 weeks before the start of an intervention. \*\* The randomisation result is revealed to the participants after the baseline questionnaire is filled in. \*\*\* The baseline questionnaire is scheduled to be filled in a few days before the 1<sup>st</sup> intervention day, but may be filled in on the 1<sup>st</sup> day (see \*\*). \*\*\*\* For the intervention group, only.

Abbreviations: quick DASH = Disabilities of the Arm, Shoulder and Hand – quick version, EOI = end of intervention, EQ5D-3L = EuroQol 5D-3L, FABQ-PA = Fear Avoidance Beliefs Questionnaire – Physical Activity, NRS = numerical rating scale (range 0–10), OSS = Oxford Shoulder Score, PGIC = Patients’ Global Impression of Change, T<sub>0</sub> = start of intervention.
